# Supplementary material for: Hepatitis C Virus Hypervariable Region 1 Variants Presented on Hepatitis B Virus Capsid-Like Particles Induce Cross-Neutralizing Antibodies
Source: PubMed Central journal article supplement (PMC4094522; doi:10.1371/journal.pone.0102235), 2014-07-11
Supplement: pone.0102235.s002.pdf [file pone.0102235.s002.pdf]

| Name   | Sequence                                              | % Neutralization |
|--------|-------------------------------------------------------|------------------|
| R9     | Q T T V V G G S Q S H T V R G L T S L F S P G A S Q N | -                |
| G31    | T - H T - - - V A R Q - H S - - - - P Q - K           | -                |
| YK5807 | V - Y T T - - - A R H T Q - V A - F - T - - P A - K   | -                |
| YK5829 | T - - - S - - H A - Q I T - - V - - F - - - - S A - K | -                |
| 1a129  | E - H - S - - - V A R - T S R - - N - - - - - M - -   | 55               |
| 1a31   | E - Y T S - - V V A Y G T - A - - G F - - Q - S N - - | 47               |
| 1a38   | G - H - T - - - A G R - T A - I A G - L T Q - - K - S | 47,6             |
| 1a46   | G - Y I S - - - A A R A T S - - V - - L T - - - K - - | 47               |
| 1b44   | S - H - S - - - A A - A A S - - - R F - - - - P - - K | 59               |
| 1b52   | T - Y - T - - A T A R - T S - F A - - - T - - - - K   | 63,7             |
| 1b58   | T - N I M - - - - A R D - S R V - - F - - - - - K     | 73,3             |
| 1b20   | T - Y T S - - - A A Y A T A - - A - - - T - - - R - - | 46               |
| 1a09   | E - Y - T - - - A G - A A S - - A - - - T T - - K - - | 17,6             |
| 1a142  | R - R - T - - T A G R E T A - F A - I - - R - - K - - | -21              |
| 1a154  | E - H - T - - N A G R - T A - - V G - L T - - - K - - | 32,6             |
| 1a154  | E - H - T - - N A G R - T A - - V G - L T - - - K - - | 13               |
| 1a157  | E - H - T - - N A G - - - A R - A G - - - - - K - -   | 4,0              |
| 1a53   | N - V L I - - Q A A Y - A S S F - A - L T - - - K - - | -34,8            |
| 1a72   | E - H - T - - T A G R A A A - - A G - - T Q - - R - S | 5,3              |
| 1a80   | N - V L I - - Q A A Y - A S S F - A - L T - - - K - - | 36,2             |
| 1b09   | S - H - T - - T A - - - T - H F A - - - - S - - - R   | -4,8             |
| 1b14   | D - H T M - - A A G R D T H K F - - - - - F - - - -   | -4,0             |
| 1b14   | D - H T M - - A A G R D T H K F - - - - - F - - - -   | 32               |
| 1b20   | E - R T I - S E V G S A T H R F - - V - - - - S R - K | 8,1              |
| 1b35   | A - H T I - - T - G R N T Y - - - T - - - - - S - - R | 33,9             |
| 1b38   | K - Y T T - - A - A - - A - - - - T - - - F - P - - - | 33               |
| MLV    |                                                       | -17,2            |
